# Supplementary material for: bsAS, an antisense long non-coding RNA, essential for correct wing development through regulation of blistered/DSRF isoform usage
Source: PubMed Central journal article supplement (PMC7793246; doi:10.1371/journal.pgen.1009245), 2020-12-28
Supplement: pgen.1009245.s008.pdf [file pgen.1009245.s008.pdf]

| <b>Sample</b> | <b>Total # reads</b> | <b># Mapped reads</b> | <b>Proportion mapped reads</b> | <b># Uniquely mapped reads</b> | <b>Proportion uniquely mapped reads</b> |
|---------------|----------------------|-----------------------|--------------------------------|--------------------------------|-----------------------------------------|
| wtEAL3.1      | 92624048             | 91486808              | 98.7722                        | 88894992                       | 97.16701                                |
| wtEAL3.2      | 77533626             | 75828528              | 97.80083                       | 73725748                       | 97.22693                                |
| wtLL3.1       | 121021466            | 107715318             | 89.00513                       | 105383724                      | 97.83541                                |
| wtLL3.2       | 109413972            | 102201120             | 93.40774                       | 97882412                       | 95.7743                                 |
| wtWL3.1       | 81030122             | 79816358              | 98.50208                       | 78079790                       | 97.8243                                 |
| wtWL3.2       | 83521572             | 82426862              | 98.68931                       | 78321148                       | 95.01896                                |
| wtELP.1       | 134304082            | 129152790             | 96.16446                       | 126591202                      | 98.01662                                |
| wtELP.2       | 132043336            | 121297912             | 91.8622                        | 118183372                      | 97.43232                                |
| wtWLP.1       | 108100128            | 105568376             | 97.65796                       | 102489310                      | 97.08334                                |
| wtWLP.2       | 144086210            | 136518300             | 94.74765                       | 133541172                      | 97.81925                                |
| bsEAL3.1      | 147819126            | 136876976             | 92.59761                       | 134435818                      | 98.21653                                |
| bsEAL3.2      | 139808904            | 106272586             | 76.01275                       | 85335706                       | 80.29889                                |
| bsWL3.1       | 184430738            | 164711012             | 89.30779                       | 160623490                      | 97.51837                                |
| bsWL3.2       | 139062704            | 136397368             | 98.08336                       | 133643534                      | 97.98102                                |
| bsELP.1       | 210915056            | 201795336             | 95.67612                       | 198332716                      | 98.28409                                |
| bsELP.2       | 206900922            | 197297590             | 95.35849                       | 193799048                      | 98.22677                                |
| bsWLP.1       | 236383298            | 224236494             | 94.86139                       | 220943980                      | 98.53168                                |
| bsWLP.2       | 223774820            | 211371452             | 94.45721                       | 207968748                      | 98.39018                                |
