# Supplementary material for: bsAS, an antisense long non-coding RNA, essential for correct wing development through regulation of blistered/DSRF isoform usage
Source: PubMed Central journal article supplement (PMC7793246; doi:10.1371/journal.pgen.1009245), 2020-12-28
Supplement: pgen.1009245.s009.pdf [file pgen.1009245.s009.pdf]

| <b>gene</b>      | <b>Gene/transcript</b> | <b>wt</b>  |            |             |            | <b><i>bsAS</i><sup>-/-</sup></b> |            |             |            |
|------------------|------------------------|------------|------------|-------------|------------|----------------------------------|------------|-------------|------------|
|                  |                        | <b>WL3</b> | <b>WLP</b> | <b>EAL3</b> | <b>ELP</b> | <b>WL3</b>                       | <b>WLP</b> | <b>EAL3</b> | <b>ELP</b> |
| <i>blistered</i> | FBgn0004101            | 25.545     | 48.175     | 7.81        | 3.87       | 72.68                            | 120.79     | 9.885       | 9.405      |
|                  | FBtr0072271 (A)        | 1.135      | 4.035      | 7.275       | 2.985      | 12.815                           | 16.215     | 9.625       | 4.755      |
|                  | FBtr0290089 (B)        | 18.89      | 42.21      | 0.535       | 0.645      | 16.13                            | 34.965     | 0.06        | 0.845      |
|                  | FBtr0343314 (C)        | 5.52       | 1.93       | 0           | 0.24       | 43.735                           | 69.61      | 0.2         | 3.805      |
| <i>bsAS</i>      | FBgn0266046            | 60.185     | 108.79     | 2.145       | 1.585      | 0.03                             | 0.075      | 0           | 0.02       |
|                  | FBtr0343311            | 60.185     | 108.79     | 2.145       | 1.585      | 0.03                             | 0.075      | 0           | 0.02       |
